# Supplementary material for: Fault zone architecture of a large plate-bounding strike-slip fault: a case study from the Alpine Fault, New Zealand
Source: Copernicus journal article supplement (doi:10.5194/se-11-95-2020), 2020-01-22
Supplement: Supplementary file 1 [file Table_S1.pdf › supplement/Table_S1.pdf]

**Table S1:** Data used for isocon analysis (see Figure 9) of structural units of the outcrops investigated in this study as well as derived isocon slopes (m) and mass gains. Data for structural units (hanging-wall; PSZ; footwall) are averages calculated from data presented in Table 5.

| location                          | unit         | MnO  | P <sub>2</sub> O <sub>5</sub> | TiO <sub>2</sub> | Na <sub>2</sub> O | K <sub>2</sub> O | CaO   | MgO   | Fe <sub>2</sub> O <sub>3</sub> <sup>a</sup> | Al <sub>2</sub> O <sub>3</sub> | SiO <sub>2</sub> | LOI   | m    | mass gain [%] |
|-----------------------------------|--------------|------|-------------------------------|------------------|-------------------|------------------|-------|-------|---------------------------------------------|--------------------------------|------------------|-------|------|---------------|
| Alpine Schist <sup>b</sup>        | host rock    | 0.09 | 0.16                          | 0.66             | 3.27              | 2.75             | 2.02  | 1.63  | 4.48                                        | 15.35                          | 67.20            | 2.01  |      |               |
| Brook Street Terrane <sup>c</sup> | host rock    | 0.18 | 0.13                          | 0.84             | 2.39              | 0.59             | 11.16 | 7.67  | 10.37                                       | 15.14                          | 47.80            | 3.74  |      |               |
| Havelock Creek                    | PSZ          | 0.13 | 0.20                          | 0.81             | 1.77              | 1.39             | 7.85  | 4.20  | 6.49                                        | 13.60                          | 51.70            | 11.49 | 0.78 | 27.40         |
| Gaunt Creek                       | PSZ          | 0.13 | 0.19                          | 0.76             | 1.94              | 3.27             | 6.78  | 3.64  | 6.66                                        | 13.43                          | 51.40            | 11.38 | 0.78 | 28.07         |
|                                   | footwall     | 0.11 | 0.21                          | 0.79             | 2.10              | 2.94             | 5.22  | 3.67  | 6.05                                        | 13.92                          | 55.35            | 9.28  | 0.84 | 19.70         |
| DFDP-1A                           | hanging-wall | 0.09 | 0.16                          | 0.63             | 1.18              | 3.50             | 4.49  | 3.07  | 4.75                                        | 13.31                          | 55.51            | 13.02 | 0.84 | 19.72         |
|                                   | PSZ          | 0.06 | 0.18                          | 0.56             | 1.29              | 3.80             | 2.03  | 2.12  | 4.00                                        | 13.25                          | 62.62            | 9.71  | 0.93 | 7.37          |
| Waikukupa Thrust                  | hanging-wall | 0.12 | 0.10                          | 0.67             | 3.52              | 0.42             | 4.16  | 3.84  | 6.29                                        | 13.30                          | 57.65            | 9.53  | 0.87 | 15.58         |
|                                   | PSZ          | 0.21 | 0.14                          | 0.65             | 1.12              | 1.95             | 17.53 | 2.70  | 5.67                                        | 11.41                          | 44.47            | 13.74 | 0.68 | 47.02         |
|                                   | footwall     | 0.11 | 0.15                          | 0.81             | 3.03              | 1.82             | 2.47  | 2.74  | 6.12                                        | 14.75                          | 64.98            | 2.74  | 0.97 | 3.22          |
| Martyr River                      | hanging-wall | 0.11 | 0.18                          | 0.69             | 2.27              | 1.80             | 8.74  | 4.50  | 6.11                                        | 13.45                          | 52.67            | 8.96  | 1.05 | -4.44         |
|                                   | PSZ          | 0.10 | 0.14                          | 0.56             | 2.09              | 1.55             | 3.50  | 10.59 | 5.99                                        | 11.07                          | 56.61            | 7.34  | 1.09 | -8.54         |

<sup>a</sup> Fe<sub>2</sub>O<sub>3</sub> is total Fe content.

<sup>b</sup> Alpine Schist data is average from (i) samples from DFDP-2B drill cuttings ICDP5052EXGY601, ICDP5052EXOY601 and ICDP5052EXLY601 (presented in Table 4 of Toy et al. (2017); (ii) samples from the Whitcombe River area (presented in Table 1 of Roser and Cooper, 1990); (iii) samples from the Big Bluff drillcore (presented in Table 2 of Roser and Cooper, 1990; except for sample 45491, which has an unusual composition); (iv) samples from the Franz Josef – Fox Glacier area (presented in Grapes et al., 1982).

<sup>c</sup> Values presented are averages derived from Table 1 in Spandler et al. (2005) and exclude data from Bluff Complex and Takitimu Mountains.
