# Supplementary material for: Fault zone architecture of a large plate-bounding strike-slip fault: a case study from the Alpine Fault, New Zealand
Source: Copernicus journal article supplement (doi:10.5194/se-11-95-2020), 2020-01-22
Supplement: Supplementary file 2 [file Table_S2.pdf › supplement/Table_S2.pdf]

**Table S2:** Enrichment (positive values) or depletion (negative values) [%] of individual elements with regard to fault rock units at locations studied. Data are averages calculated from data presented in Table 6.

| location         | unit         | MnO    | P <sub>2</sub> O <sub>5</sub> | TiO <sub>2</sub> | Na <sub>2</sub> O | K <sub>2</sub> O | CaO     | MgO    | Fe <sub>2</sub> O <sub>3</sub> <sup>a</sup> | Al <sub>2</sub> O <sub>3</sub> | SiO <sub>2</sub> | LOI    |
|------------------|--------------|--------|-------------------------------|------------------|-------------------|------------------|---------|--------|---------------------------------------------|--------------------------------|------------------|--------|
| Havelock Creek   | PSZ          | 94.85  | 65.08                         | 55.91            | -31.00            | -35.68           | 395.11  | 228.83 | 84.44                                       | 12.86                          | -1.98            | 629.70 |
| Gaunt Creek      | PSZ          | 98.89  | 52.93                         | 47.97            | -23.97            | 52.11            | 329.87  | 186.48 | 90.26                                       | 12.03                          | -2.03            | 626.44 |
|                  | footwall     | 52.05  | 57.04                         | 43.80            | -23.26            | 27.66            | 209.11  | 170.12 | 61.67                                       | 8.56                           | -1.41            | 454.19 |
| DFDP-1A          | hanging-wall | 30.72  | 27.58                         | 16.60            | -57.33            | 52.86            | 194.04  | 135.07 | 29.61                                       | 4.05                           | -1.20            | 726.69 |
|                  | PSZ          | -26.74 | 22.07                         | -8.06            | -57.62            | 48.18            | 7.90    | 39.87  | -4.20                                       | -7.34                          | 0.05             | 419.42 |
| Waikukupa Thrust | hanging-wall | 64.97  | -26.90                        | 17.53            | 24.26             | -82.46           | 138.77  | 171.91 | 61.83                                       | 0.11                           | -0.83            | 455.16 |
|                  | PSZ          | 281.26 | 34.50                         | 44.46            | -50.56            | 4.37             | 1263.34 | 144.54 | 86.67                                       | 9.35                           | -2.81            | 912.78 |
|                  | footwall     | 37.22  | 0.31                          | 26.31            | -4.30             | -31.77           | 26.22   | 73.80  | 40.91                                       | -0.83                          | -0.18            | 41.14  |
| Martyr River     | hanging-wall | -43.42 | 26.05                         | -21.40           | -9.39             | 189.57           | -25.18  | -43.95 | -43.67                                      | -15.12                         | 5.29             | 128.73 |
|                  | PSZ          | -49.46 | -1.42                         | -39.56           | -20.16            | 138.65           | -71.32  | 26.24  | -47.15                                      | -33.13                         | 8.31             | 79.31  |

<sup>a</sup> Fe<sub>2</sub>O<sub>3</sub> is total Fe content.
