# Supplementary material for: Fault zone architecture of a large plate-bounding strike-slip fault: a case study from the Alpine Fault, New Zealand
Source: Copernicus journal article supplement (doi:10.5194/se-11-95-2020), 2020-01-22
Supplement: Supplementary file [file se-11-95-2020-supplement-title-page.pdf › se-11-95-2020-supplement-title-page.pdf]

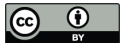

## *Supplement of*

# **Fault zone architecture of a large plate-bounding strike-slip fault: a case study from the Alpine Fault, New Zealand**

**Bernhard Schuck et al.**

*Correspondence to:* Bernhard Schuck ([bernhard.schuck@gfz-potsdam.de](mailto:bernhard.schuck@gfz-potsdam.de))

- [se-11-95-2020-supplement-title-page.pdf](#)
- [supplement](#)
  - [.DS\\_Store](#)
  - [Table\\_S1.pdf](#)
  - [Table\\_S2.pdf](#)
  - [diffractograms](#)
    - \* [sample\\_115\\_diffractograms.txt](#)
    - \* [sample\\_116\\_diffractograms.txt](#)
    - \* [sample\\_117\\_diffractograms.txt](#)
    - \* [sample\\_118\\_diffractograms.txt](#)
    - \* [sample\\_119\\_diffractograms.txt](#)
    - \* [sample\\_120\\_diffractograms.txt](#)
    - \* [sample\\_124\\_diffractograms.txt](#)
    - \* [sample\\_125\\_1\\_diffractograms.txt](#)
    - \* [sample\\_127\\_3\\_diffractograms.txt](#)
    - \* [sample\\_127\\_4\\_diffractograms.txt](#)
    - \* [sample\\_129\\_diffractograms.txt](#)
    - \* [sample\\_130\\_1\\_diffractograms.txt](#)
    - \* [sample\\_130\\_2\\_diffractograms.txt](#)
    - \* [sample\\_130\\_3\\_diffractograms.txt](#)
    - \* [sample\\_131\\_1\\_diffractograms.txt](#)
    - \* [sample\\_131\\_2\\_diffractograms.txt](#)
    - \* [sample\\_132\\_diffractograms.txt](#)
    - \* [sample\\_133\\_diffractograms.txt](#)

The copyright of individual parts of the supplement might differ from the CC BY 4.0 License.
